# Supplementary material for: Emissions of intermediate-volatility and semi-volatile organic compounds (I/SVOCs) from different cumulative-mileage diesel vehicles at various ambient temperatures
Source: Copernicus journal article supplement (doi:10.5194/acp-25-2695-2025), 2025-03-03
Supplement: Supplementary file 1 [file acp-25-2695-2025-supplement.pdf]

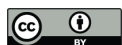

*Supplement of*

**Emissions of intermediate-volatility and semi-volatile organic compounds (I/SVOCs) from different cumulative-mileage diesel vehicles at various ambient temperatures**

**Shuwen Guo et al.**

*Correspondence to:* Xuan Zheng (x-zheng11@szu.edu.cn)

The copyright of individual parts of the supplement might differ from the article licence.

1 **S1. Description of all organic category names.**

2 Alkane: n-alkane and i-alkane. Alcohol: aliphatic alcohol. Phenol: organics containing one benzene  
3 ring and a hydrocarbon group directly attached to the benzene ring. Carbonyls: aliphatic ketone and  
4 aliphatic aldehyde. Acid: aliphatic acid. Oxy-PAH & Oxy-benzene: organic compounds containing  
5 benzene rings and oxygen-containing groups, except for phenols whose hydroxyl group is directly  
6 connected to one benzene ring. PAH\_2rings: PAH with 2 benzene rings. PAH\_3rings: PAH with 3  
7 benzene rings. PAH\_4rings: PAH with 4 benzene rings. Alkene: organics containing carbon double  
8 bond(s) without any other function groups. Cycloalkane: organics containing a saturated carbon ring  
9 without any other function groups.

10  
11 **S2. Description of the steps for qualitatively identifying organic compounds using mass**  
12 **spectrometry principles.**

13 Taking alkanes as an example, compounds containing hydrocarbon chains give rise to a series of  
14 ions separated by 14 Da (-CH<sub>2</sub>-). As a result, the top ions to identify alkanes would be  $m/z = 43$ ,  
15  $m/z = 57$ ,  $m/z = 71$ , and  $m/z = 84$  (He et al., 2022a, b). Due to the stability of chemical groups,  
16 generally, the abundance of  $m/z = 57$  is highest, followed by  $m/z = 43$  and  $m/z = 71$ . When  
17 incorporating these rules into the data treatment software (Canvas, version 2.5, J&X Technologies),  
18 a few steps need to be taken, as shown in Fig. S1(a). Four built-in features can be deployed. ABUND  
19 (X) returns the normalized abundance of the input ion mass; HASMASS (X) returns the value to  
20 indicate if the input ion exists; ORDER (X) returns the order of the input ion mass; MASS (X)  
21 returns the mass of the input ion's order. Additionally, the function allows two logical operators,  
22 "And" and "Or". Then, the cluster of alkanes can be extracted by the following rules:

23  $((\text{MASS}(1)=43 \ \&\& \ (\text{MASS}(2)=57 \ || \ \text{MASS}(2)=71 \ || \ \text{MASS}(2)=41)) \ || \ (\text{MASS}(1)=57 \ \&\& \$   
24  $(\text{MASS}(2)=43 \ || \ \text{MASS}(2)=71 \ || \ \text{MASS}(2)=41)))$

25 where "&&" and "||" refer to the logical operators "And" and "Or", respectively. Paste the rules in  
26 Ion Extractor Editor and the cluster of alkanes can be filtered, as shown in Fig. S1(b).

27  
28  
29 **Table S1. Sets of test cycles.**

| No. | Vehicle ID | Ambient Temperature | Cold- or Hot-start Cycle | Repetitions |
|-----|------------|---------------------|--------------------------|-------------|
| 1   | D1         | 23 °C               | Cold-start cycle         | 2           |
| 2   | D1         | 23 °C               | Hot-start cycle          | 2           |
| 3   | D2         | 23 °C               | Cold-start cycle         | 2           |
| 4   | D2         | 23 °C               | Hot-start cycle          | 2           |
| 5   | D2         | 0 °C                | Hot-start cycle          | 2           |
| 6   | D3         | 23 °C               | Cold-start cycle         | 3           |
| 7   | D3         | 23 °C               | Hot-start cycle          | 3           |
| 8   | D4         | 23 °C               | Cold-start cycle         | 3           |
| 9   | D4         | 23 °C               | Hot-start cycle          | 3           |
| 10  | D4         | 0 °C                | Hot-start cycle          | 2           |

30  
31  
32

**Table S2. The list of 120 external standard curves used in this study.**

| No. | Groups    | Name              | Molecular Formula                            | Cas No.    | R <sup>2</sup> |
|-----|-----------|-------------------|----------------------------------------------|------------|----------------|
| 1   | Alkane    | Heptane           | C <sub>7</sub> H <sub>16</sub>               | 142-82-5   | 0.973          |
| 2   | Alkane    | Octane            | C <sub>8</sub> H <sub>18</sub>               | 111-65-9   | 0.984          |
| 3   | Alkane    | Nonane            | C <sub>9</sub> H <sub>20</sub>               | 111-84-2   | 0.996          |
| 4   | Alkane    | Decane            | C <sub>10</sub> H <sub>22</sub>              | 124-18-5   | 0.995          |
| 5   | Alkane    | Undecane          | C <sub>11</sub> H <sub>24</sub>              | 1120-21-4  | 0.992          |
| 6   | Alkane    | Dodecane          | C <sub>12</sub> H <sub>26</sub>              | 112-40-3   | 0.973          |
| 7   | Alkane    | Tridecane         | C <sub>13</sub> H <sub>28</sub>              | 629-50-5   | 0.975          |
| 8   | Alkane    | Tetradecane       | C <sub>14</sub> H <sub>30</sub>              | 629-59-4   | 0.985          |
| 9   | Alkane    | Pentadecane       | C <sub>15</sub> H <sub>32</sub>              | 629-62-9   | 0.987          |
| 10  | Alkane    | Hexadecane        | C <sub>16</sub> H <sub>34</sub>              | 544-76-3   | 0.988          |
| 11  | Alkane    | heptadecane       | C <sub>17</sub> H <sub>36</sub>              | 629-78-7   | 0.975          |
| 12  | Alkane    | Octadecane        | C <sub>18</sub> H <sub>38</sub>              | 593-45-3   | 0.969          |
| 13  | Alkane    | Nonadecane        | C <sub>19</sub> H <sub>40</sub>              | 629-92-5   | 0.987          |
| 14  | Alkane    | Eicosane          | C <sub>20</sub> H <sub>42</sub>              | 112-95-8   | 0.961          |
| 15  | Alkane    | Heneicosane       | C <sub>21</sub> H <sub>44</sub>              | 629-94-7   | 0.962          |
| 16  | Alkane    | Docosane          | C <sub>22</sub> H <sub>46</sub>              | 629-97-0   | 0.976          |
| 17  | Alkane    | Tricosane         | C <sub>23</sub> H <sub>48</sub>              | 638-67-5   | 0.971          |
| 18  | Alkane    | Tetracosane       | C <sub>24</sub> H <sub>50</sub>              | 646-31-1   | 0.973          |
| 19  | Alkane    | Pentacosane       | C <sub>25</sub> H <sub>52</sub>              | 629-99-2   | 0.995          |
| 20  | Alkane    | Hexacosane        | C <sub>26</sub> H <sub>54</sub>              | 630-01-3   | 0.990          |
| 21  | Alkane    | Heptacosane       | C <sub>27</sub> H <sub>56</sub>              | 593-49-7   | 0.977          |
| 22  | Alkane    | Octacosane        | C <sub>28</sub> H <sub>58</sub>              | 630-02-4   | 0.982          |
| 23  | Alkane    | Nonacosane        | C <sub>29</sub> H <sub>60</sub>              | 630-03-5   | 0.972          |
| 24  | Alkane    | Triacontane       | C <sub>30</sub> H <sub>62</sub>              | 638-68-6   | 0.963          |
| 25  | Alkane    | Hentriacontane    | C <sub>31</sub> H <sub>64</sub>              | 630-04-6   | 0.971          |
| 26  | Alkane    | Dotriacontane     | C <sub>32</sub> H <sub>66</sub>              | 544-85-4   | 0.956          |
| 27  | Alkane    | Tritriacontane    | C <sub>33</sub> H <sub>68</sub>              | 630-05-7   | 0.959          |
| 28  | Alkane    | Tetratriacontane  | C <sub>34</sub> H <sub>70</sub>              | 14167-59-0 | 0.957          |
| 29  | Alkane    | Pentatriacontane  | C <sub>35</sub> H <sub>72</sub>              | 630-07-9   | 0.989          |
| 30  | Alkane    | Hexatriacontane   | C <sub>36</sub> H <sub>74</sub>              | 630-06-8   | 0.980          |
| 31  | Alkane    | Heptatriacontane  | C <sub>37</sub> H <sub>76</sub>              | 7194-84-5  | 0.989          |
| 32  | Alkene    | Octene            | C <sub>8</sub> H <sub>16</sub>               | 111-66-0   | 0.992          |
| 33  | Alkene    | Decene            | C <sub>10</sub> H <sub>20</sub>              | 872-05-9   | 0.982          |
| 34  | Alkene    | Dodecene          | C <sub>12</sub> H <sub>24</sub>              | 112-41-4   | 0.959          |
| 35  | Alkene    | Tetradecene       | C <sub>14</sub> H <sub>28</sub>              | 1120-36-1  | 0.976          |
| 36  | Alkene    | Hexadecene        | C <sub>16</sub> H <sub>32</sub>              | 629-73-2   | 0.985          |
| 37  | Alkene    | Octadecene        | C <sub>18</sub> H <sub>36</sub>              | 112-88-9   | 0.986          |
| 38  | Alkene    | Eicosene          | C <sub>20</sub> H <sub>40</sub>              | 3452-07-1  | 0.988          |
| 39  | Alkene    | Docosene          | C <sub>22</sub> H <sub>44</sub>              | 1599-67-3  | 0.987          |
| 40  | Alkyl-PAH | Methylnaphthalene | C <sub>11</sub> H <sub>10</sub>              | 90-12-0    | 0.997          |
| 41  | Acid      | Isobutyric Acid   | C <sub>4</sub> H <sub>8</sub> O <sub>2</sub> | 79-31-2    | 0.989          |

| No. | Groups      | Name                   | Molecular Formula                              | Cas No.    | R <sup>2</sup> |
|-----|-------------|------------------------|------------------------------------------------|------------|----------------|
| 42  | Acid        | 2-Methyl butyric acid  | C <sub>5</sub> H <sub>10</sub> O <sub>2</sub>  | 116-53-0   | 0.986          |
| 43  | Acid        | Tetradecanoic acid     | C <sub>11</sub> H <sub>22</sub> O <sub>2</sub> | 544-63-8   | 0.981          |
| 44  | Acid        | heptadecanoic acid     | C <sub>14</sub> H <sub>28</sub> O <sub>2</sub> | 506-12-7   | 0.984          |
| 45  | Acid        | Undecanoic acid        | C <sub>17</sub> H <sub>34</sub> O <sub>2</sub> | 112-37-8   | 0.984          |
| 46  | Alcohol     | Decanol                | C <sub>10</sub> H <sub>22</sub> O              | 112-30-1   | 0.982          |
| 47  | Alcohol     | Tridecanol             | C <sub>13</sub> H <sub>28</sub> O              | 26248-42-0 | 0.987          |
| 48  | Alcohol     | Hexadecanol            | C <sub>16</sub> H <sub>34</sub> O              | 36653-82-4 | 0.961          |
| 49  | Alcohol     | Nonadecanol            | C <sub>19</sub> H <sub>40</sub> O              | 1454-84-8  | 0.953          |
| 50  | Alcohol     | Docosanol              | C <sub>22</sub> H <sub>46</sub> O              | 661-19-8   | 0.994          |
| 51  | Aldehyde    | Valeraldehyde          | C <sub>5</sub> H <sub>10</sub> O               | 110-62-3   | 0.966          |
| 52  | Aldehyde    | 1-Pentanecarbaldehyde  | C <sub>6</sub> H <sub>12</sub> O               | 66-25-1    | 0.996          |
| 53  | Aldehyde    | Octanal                | C <sub>8</sub> H <sub>16</sub> O               | 124-13-0   | 0.995          |
| 54  | Aldehyde    | Decylaldehyde          | C <sub>10</sub> H <sub>20</sub> O              | 112-31-2   | 0.994          |
| 55  | Aldehyde    | Dodecanal              | C <sub>12</sub> H <sub>24</sub> O              | 112-54-9   | 0.957          |
| 56  | Aldehyde    | Tetradecanal           | C <sub>14</sub> H <sub>28</sub> O              | 124-25-4   | 0.978          |
| 57  | Aldehyde    | Hexadecanal            | C <sub>16</sub> H <sub>32</sub> O              | 629-80-1   | 0.955          |
| 58  | Aldehyde    | Octadecanone           | C <sub>18</sub> H <sub>36</sub> O              | 638-66-4   | 0.968          |
| 59  | Aldehyde    | Icosanal               | C <sub>20</sub> H <sub>40</sub> O              | 2400-66-0  | 0.959          |
| 60  | Aldehyde    | Docosanal              | C <sub>22</sub> H <sub>44</sub> O              | 57402-36-5 | 0.952          |
| 61  | Alkyl-PAH   | Ethyl-naphthalene      | C <sub>12</sub> H <sub>12</sub>                | 1127-76-0  | 0.971          |
| 62  | Amide       | Acetamide              | C <sub>2</sub> H <sub>5</sub> NO               | 60-35-5    | 1.000          |
| 63  | Amide       | Propanamide            | C <sub>3</sub> H <sub>7</sub> NO               | 79-05-0    | 0.960          |
| 64  | Amide       | N,N-Dibutylformamide   | C <sub>9</sub> H <sub>19</sub> NO              | 761-65-9   | 0.952          |
| 65  | Amine       | Triethylamine          | C <sub>6</sub> H <sub>15</sub> N               | 121-44-8   | 0.986          |
| 66  | Amine       | Aniline                | C <sub>6</sub> H <sub>7</sub> N                | 62-53-3    | 0.981          |
| 67  | Amine       | 2-Aminoaniline         | C <sub>6</sub> H <sub>8</sub> N <sub>2</sub>   | 95-54-5    | 0.997          |
| 68  | Amine       | Dibutylamine           | C <sub>8</sub> H <sub>19</sub> N               | 111-92-2   | 0.990          |
| 69  | Amine       | 1-Naphthalenamine      | C <sub>10</sub> H <sub>9</sub> N               | 134-32-7   | 0.962          |
| 70  | Amine       | 4-Biphenylamine        | C <sub>12</sub> H <sub>11</sub> N              | 92-67-1    | 0.994          |
| 71  | Aromatic    | Ethylbenzene           | C <sub>8</sub> H <sub>10</sub>                 | 100-41-4   | 0.996          |
| 72  | Aromatic    | p-xylene               | C <sub>8</sub> H <sub>10</sub>                 | 106-42-3   | 0.993          |
| 73  | Aromatic    | o-xylene               | C <sub>8</sub> H <sub>10</sub>                 | 95-47-6    | 0.993          |
| 74  | Aromatic    | Isopropylbenzene       | C <sub>9</sub> H <sub>12</sub>                 | 98-82-8    | 0.995          |
| 75  | Aromatic    | 4-Ethyltoluene         | C <sub>9</sub> H <sub>12</sub>                 | 622-96-8   | 0.982          |
| 76  | Aromatic    | 1,3,5-trimethylbenzene | C <sub>9</sub> H <sub>12</sub>                 | 108-67-8   | 0.993          |
| 77  | Aromatic    | p-Cymene               | C <sub>10</sub> H <sub>14</sub>                | 99-87-6    | 0.966          |
| 78  | Aromatic    | butyl-benzene          | C <sub>10</sub> H <sub>14</sub>                | 104-51-8   | 0.993          |
| 79  | Aromatic    | pentyl-benzene         | C <sub>11</sub> H <sub>16</sub>                | 538-68-1   | 0.974          |
| 80  | Aromatic    | hexyl-benzene          | C <sub>12</sub> H <sub>18</sub>                | 1077-16-3  | 0.973          |
| 81  | Cycloalkane | Ethyl-cyclohexane      | C <sub>8</sub> H <sub>16</sub>                 | 1678-91-7  | 0.950          |
| 82  | Cycloalkane | Butyl-cyclohexane      | C <sub>10</sub> H <sub>20</sub>                | 1678-93-9  | 0.986          |
| 83  | Cycloalkane | Hexyl-cyclohexane      | C <sub>12</sub> H <sub>24</sub>                | 4292-75-5  | 0.968          |

| No. | Groups      | Name                          | Molecular Formula                              | Cas No.    | R <sup>2</sup> |
|-----|-------------|-------------------------------|------------------------------------------------|------------|----------------|
| 84  | Cycloalkane | Octyl-cyclohexane             | C <sub>14</sub> H <sub>28</sub>                | 1795-15-9  | 0.950          |
| 85  | Cycloalkane | Decyl-cyclohexane             | C <sub>16</sub> H <sub>32</sub>                | 1795-16-0  | 0.955          |
| 86  | Cycloalkane | Dodecyl-cyclohexane           | C <sub>18</sub> H <sub>36</sub>                | 1795-17-1  | 0.974          |
| 87  | Cycloalkane | Tetradecyl-cyclohexane        | C <sub>20</sub> H <sub>40</sub>                | 1795-18-2  | 0.969          |
| 88  | Cycloalkane | Hexadecyl-cyclohexane         | C <sub>22</sub> H <sub>44</sub>                | 6812-38-0  | 0.979          |
| 89  | Ester       | Butyl acetate                 | C <sub>6</sub> H <sub>12</sub> O <sub>2</sub>  | 123-86-4   | 0.979          |
| 90  | Ester       | Isoamyl Acetate               | C <sub>7</sub> H <sub>14</sub> O <sub>2</sub>  | 123-92-2   | 0.995          |
| 91  | Ester       | Amyl Acetate                  | C <sub>7</sub> H <sub>14</sub> O <sub>2</sub>  | 628-63-7   | 0.973          |
| 92  | Furan       | Furan                         | C <sub>4</sub> H <sub>4</sub> O                | 110-00-9   | 0.961          |
| 93  | Ketone      | 2-Pentanone                   | C <sub>5</sub> H <sub>10</sub> O <sub>2</sub>  | 107-87-9   | 0.990          |
| 94  | Ketone      | 3-Heptanone                   | C <sub>7</sub> H <sub>14</sub> O               | 106-35-4   | 0.995          |
| 95  | Ketone      | 2-Nonanone                    | C <sub>9</sub> H <sub>18</sub> O               | 821-55-6   | 0.984          |
| 96  | Ketone      | 2-Dodecanone                  | C <sub>12</sub> H <sub>24</sub> O              | 6175-49-1  | 0.972          |
| 97  | Ketone      | Pentadecanone                 | C <sub>15</sub> H <sub>30</sub> O              | 2345-28-0  | 0.986          |
| 98  | Oxy-PAH     | 1,4-naphthoquinone            | C <sub>10</sub> H <sub>6</sub> O <sub>2</sub>  | 130-15-4   | 0.994          |
| 99  | Oxy-PAH     | 1-naphthaldehyde              | C <sub>11</sub> H <sub>8</sub> O               | 66-77-3    | 0.982          |
| 100 | Oxy-PAH     | 9,10-anthraquinone            | C <sub>14</sub> H <sub>8</sub> O <sub>2</sub>  | 84-65-1    | 0.992          |
| 101 | Oxy-PAH     | benzo[a]anthracene-7,12-dione | C <sub>18</sub> H <sub>10</sub> O <sub>2</sub> | 2498-66-0  | 0.983          |
| 102 | PAH         | Indene                        | C <sub>9</sub> H <sub>8</sub>                  | 95-13-6    | 0.990          |
| 103 | PAH         | Naphthalene                   | C <sub>10</sub> H <sub>8</sub>                 | 91-20-3    | 0.997          |
| 104 | PAH         | Acenaphthylene                | C <sub>12</sub> H <sub>8</sub>                 | 208-96-8   | 0.996          |
| 105 | PAH         | Acenaphthene                  | C <sub>12</sub> H <sub>10</sub>                | 83-32-9    | 0.989          |
| 106 | PAH         | Fluorene                      | C <sub>13</sub> H <sub>10</sub>                | 86-73-7    | 0.997          |
| 107 | PAH         | Phenanthrene                  | C <sub>14</sub> H <sub>10</sub>                | 85-01-8    | 0.994          |
| 108 | PAH         | Anthracene                    | C <sub>14</sub> H <sub>10</sub>                | 120-12-7   | 0.992          |
| 109 | PAH         | Pyrene                        | C <sub>16</sub> H <sub>10</sub>                | 129-00-0   | 0.992          |
| 110 | PAH         | Benz[a]anthracene             | C <sub>18</sub> H <sub>12</sub>                | 56-55-3    | 0.973          |
| 111 | PAH         | Chrysene                      | C <sub>18</sub> H <sub>12</sub>                | 218-01-9   | 0.973          |
| 112 | PAH         | Benzo[b]fluoranthene          | C <sub>20</sub> H <sub>12</sub>                | 205-99-2   | 0.961          |
| 113 | PAH         | Benzo[k]fluoranthene          | C <sub>20</sub> H <sub>12</sub>                | 207-08-9   | 0.983          |
| 114 | PAH         | Benzo[a]pyrene                | C <sub>20</sub> H <sub>12</sub>                | 50-32-8    | 0.967          |
| 115 | PAH         | Indeno[1,2,3-cd]fluoranthene  | C <sub>22</sub> H <sub>12</sub>                | 193-39-5   | 0.991          |
| 116 | Pinene      | (+)-alpha-Pinene              | C <sub>10</sub> H <sub>16</sub>                | 7785-70-8  | 0.950          |
| 117 | Pinene      | β-Pinene                      | C <sub>10</sub> H <sub>16</sub>                | 18172-67-3 | 0.991          |
| 118 | Polyphenyls | Biphenyl                      | C <sub>12</sub> H <sub>10</sub>                | 92-52-4    | 0.952          |
| 119 | Polyphenyls | p-terphenyl                   | C <sub>18</sub> H <sub>14</sub>                | 92-94-4    | 0.967          |
| 120 | Polyphenyls | p-quaterphenyl                | C <sub>24</sub> H <sub>18</sub>                | 135-70-6   | 0.987          |

34

35

36

37 **Table S3. Average THC, NO<sub>x</sub>, and CO EF<sub>s</sub> for LMV and HMV, respectively.**

| Vehicle  | Test Cycle | THC (mg·km <sup>-1</sup> ) | NO <sub>x</sub> (mg·km <sup>-1</sup> ) | CO (mg·km <sup>-1</sup> ) |
|----------|------------|----------------------------|----------------------------------------|---------------------------|
| LMV (D2) | Hot_23°C   | 35                         | 6951                                   | 600                       |
|          | Hot_0°C    | 38                         | 8048                                   | 657                       |
| HMV (D4) | Hot_23°C   | 289                        | 2629                                   | 359                       |
|          | Hot_0°C    | 302                        | 3555                                   | 404                       |

38

(a) Open Canvas → Open Browser → File → Load Data (load a sample) → Speciation → Find All Peaks → Mass Spectrum → Extraction Rules

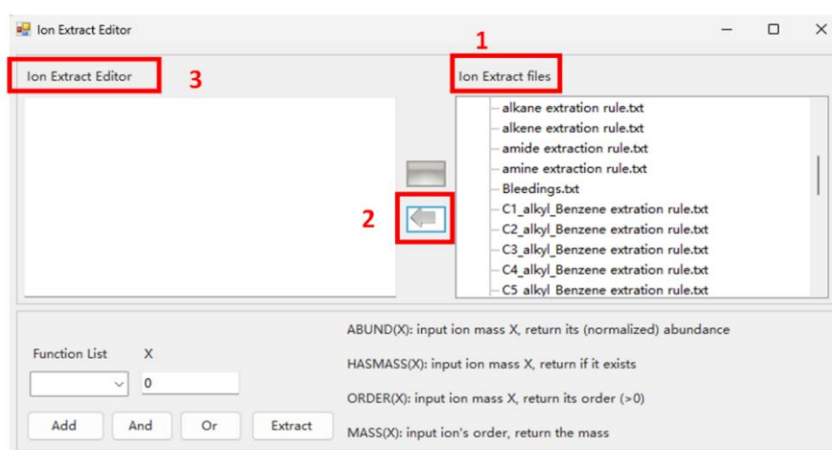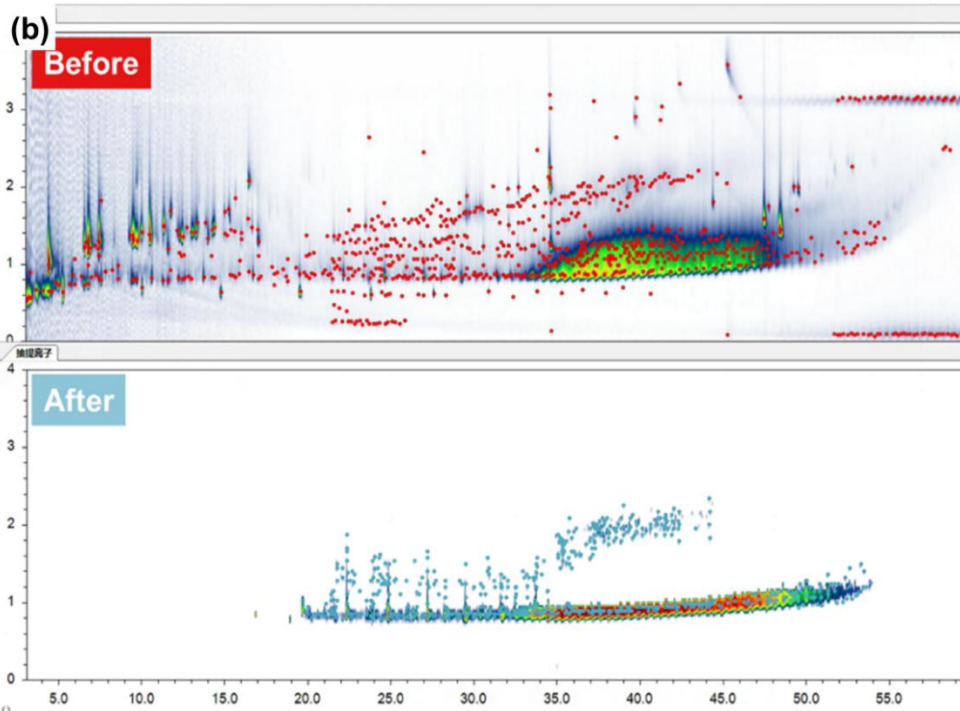

39

40 **Figure S1. (a) The steps to enable the ion extract function built in Canvas software. Canvas is the**  
 41 **supporting software of solid-state modulator (SSM1810, J&X Technologies, China) and is not**  
 42 **originally created by the authors of this research. (b) Comprehensive two-dimensional**  
 43 **chromatograms before and after screening alkanes. Each red and blue point represents a**  
 44 **chromatographic peak.**

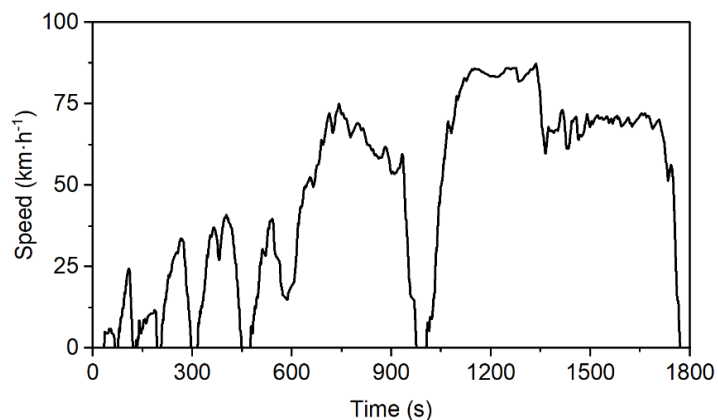

45

46 **Figure S2. CHTC-TT test cycle for tractor trailers.** The cycle lasts 1800 s, with the first 473 s as  
 47 phase 1 and the last 1327 s as phase 2. The total driving distance is about 23 km, and the maximum  
 48 speed is 88 km·h<sup>-1</sup>.

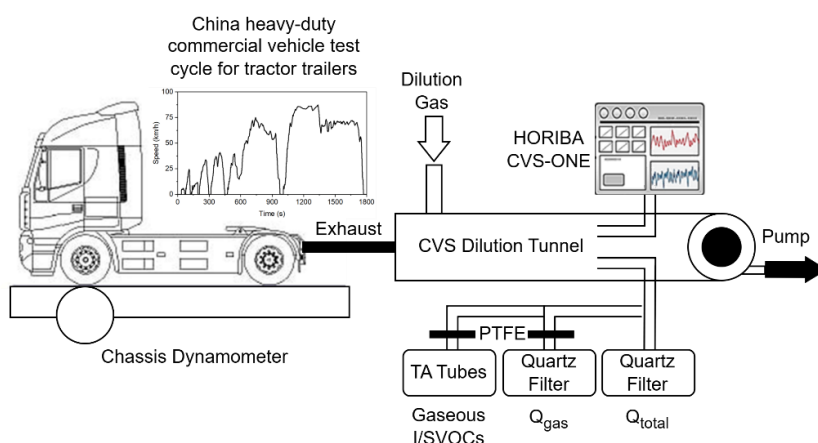

49

50

**Figure S3. A schematic of the sampling systems.**

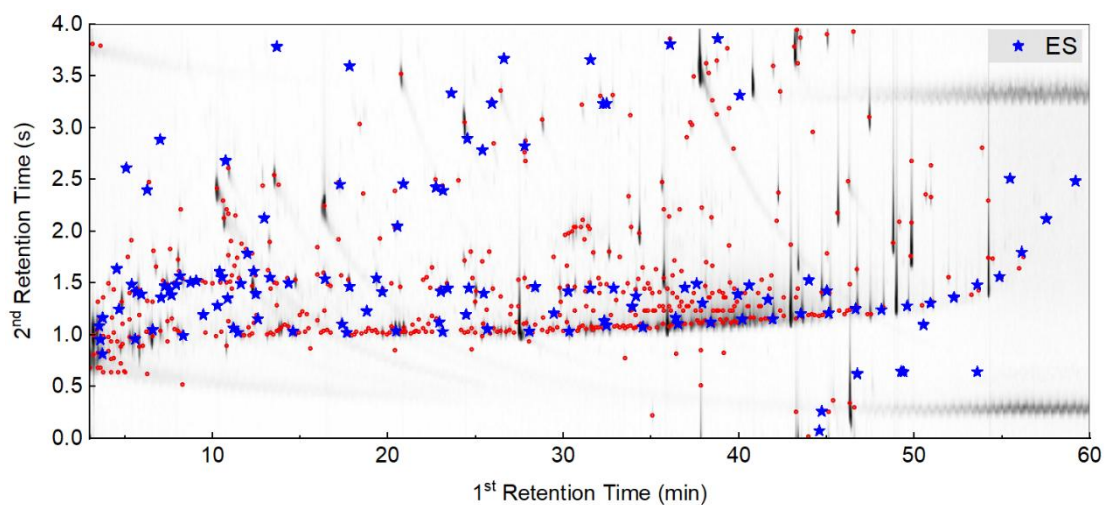

51

52 **Figure S4. Actual GC×GC chromatogram and sample chromatographic peaks (the red dots).** The  
 53 **blue stars represent all ES used in this study including n-alkanes, PAHs, carbonyls, etc.** All their  
 54 **detailed information was listed in Table S2.**

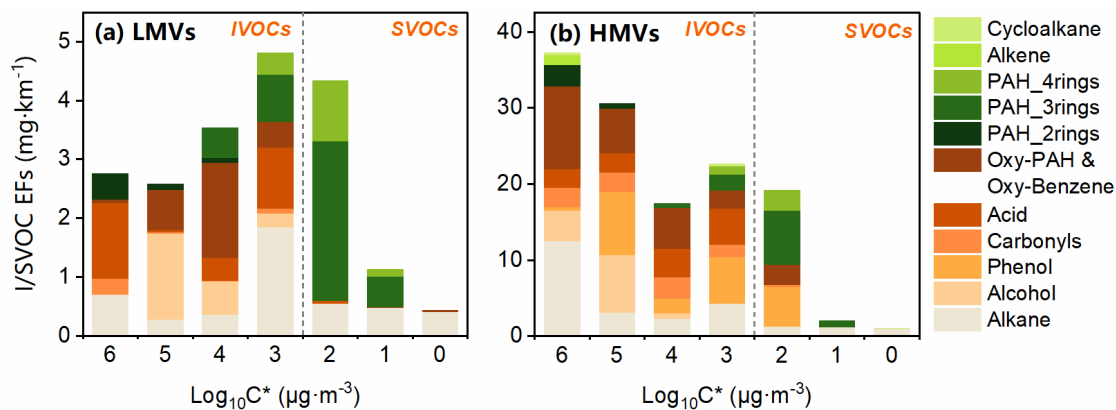

55

56 **Figure S5. The average volatility distribution of I/SVOCs from the (a) LMVs and (b) HMs.**

57

Different colored bars represent different organic groups.

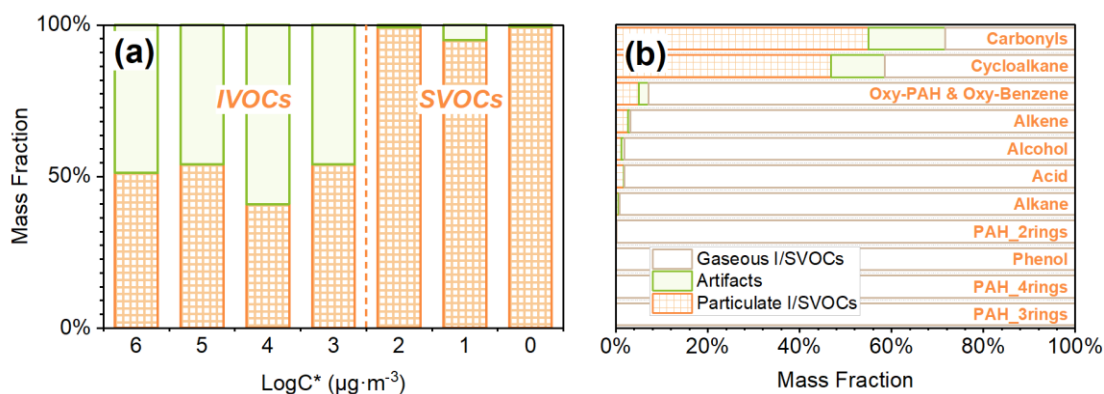

58

59 **Figure S6.(a) The mass fraction of artifacts and particulate I/SVOCs divided by C\* captured by**  
 60 **quartz. (b) Gas-particle partition and artifacts of various organic compound groups.**

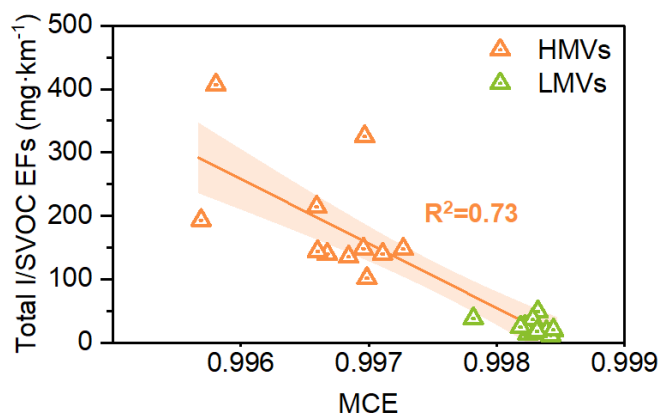

61

62

**Figure S7. The linear correlation between total I/SVOC EFs and MCE.**



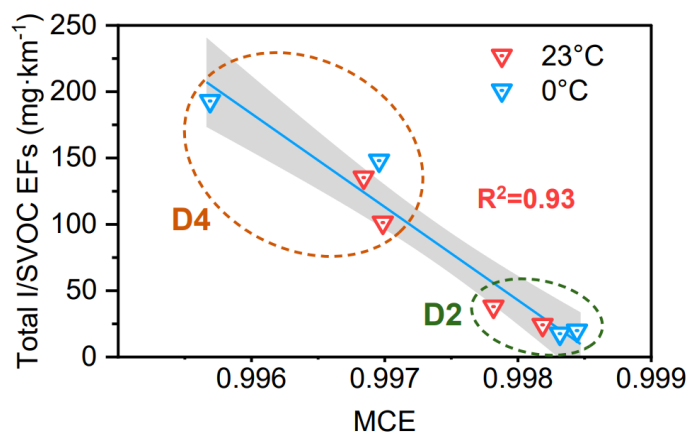

63

64 **Figure S8. The linear correlation between hot-start cycle I/SVOC EFs and MCE of LMV (D2)**  
 65 **and HMV (D4) at different ambient temperatures.**

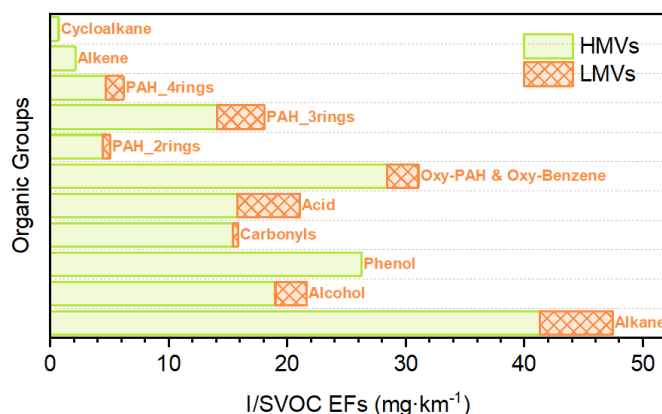

66

67 **Figure S9. The average organic group distribution of HMVs and LMVs.**

68

69 **References**

70 He, X., Zheng, X., Zhang, S., Wang, X., Chen, T., Zhang, X., Huang, G., Cao, Y., He, L., Cao, X.,  
 71 Cheng, Y., Wang, S., and Wu, Y.: Comprehensive characterization of particulate intermediate-  
 72 volatility and semi-volatile organic compounds (I/SVOCs) from heavy-duty diesel vehicles using  
 73 two-dimensional gas chromatography time-of-flight mass spectrometry, *Atmos. Chem. Phys.*, 22,  
 74 13935–13947, <https://doi.org/10.5194/acp-22-13935-2022>, 2022a.

75 He, X., Zheng, X., You, Y., Zhang, S., Zhao, B., Wang, X., Huang, G., Chen, T., Cao, Y., He, L.,  
 76 Chang, X., Wang, S., and Wu, Y.: Comprehensive chemical characterization of gaseous I/SVOC  
 77 emissions from heavy-duty diesel vehicles using two-dimensional gas chromatography time-of-  
 78 flight mass spectrometry, *Environ. Pollut.*, 305, 119284,  
 79 <https://doi.org/10.1016/j.envpol.2022.119284>, 2022b.
